# Supplementary material for: Drug-selected population in melanoma A2058 cells as melanoma stem-like cells retained angiogenic features &#x2013; the potential roles of heparan-sulfate binding ANGPTL4 protein
Source: publisher site journal article supplement (doi:10.18632/aging.103890), 2020-11-10
Supplement: Supplementary file [file aging-v12i22-103890-supplementary-material-SD1.pdf]

**SUPPLEMENTARY FIGURE**

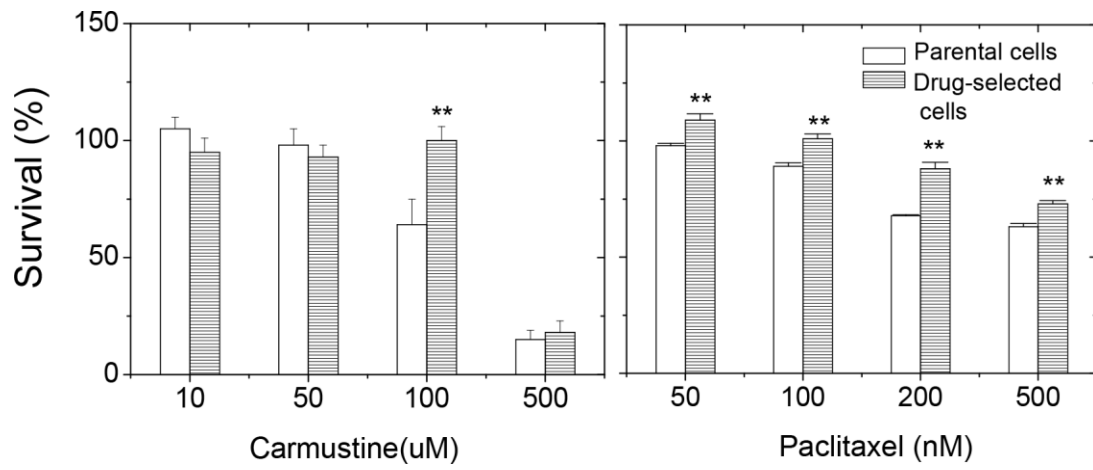

**Supplementary Figure 1. Drug-selected cells were more resistant to the treatment of carmustine or paclitaxel.**
